# Supplementary material for: Landscape Composition and Soil Physical–Chemical Properties Drive the Assemblages of Bacteria and Fungi in Conventional Vegetable Fields
Source: MDPI journal article supplement (doi:10.3390/microorganisms10061202), 2022-06-12
Supplement: s1 [file s1]

## *Supplementary Material*

# **Landscape Composition and Soil Physical-chemical Properties Drive the Assemblages of Bacteria and fungi in Conventional Vegetable Fields**

**Uttam Kumar**<sup>1,2,3,†</sup>, **Hafiz Sohaib Ahmed Saqib**<sup>1,2,3,4,†,\*</sup>, **Waqar Islam**<sup>5,6</sup>, **Parmar Prashant**<sup>1,2,3</sup>, **Nidhibahen Patel**<sup>1,2,3</sup>, **Wei Chen**<sup>1,2,3</sup>, **Feiying Yang**<sup>1,2,3,7</sup>, **Minsheng You**<sup>1,2,3</sup>, **Weyi He**<sup>1,2,3,\*</sup>

<sup>1</sup> State Key Laboratory of Ecological Pest Control for Fujian and Taiwan Crops, Institute of Applied Ecology, Fujian Agriculture and Forestry University, Fuzhou 350002, China

<sup>2</sup> Joint International Research Laboratory of Ecological Pest Control, Ministry of Education, Fuzhou 350002, China

<sup>3</sup> Ministerial and Provincial Joint Innovation Centre for Safety Production of Cross-Strait Crops, Fujian Agriculture and Forestry University, Fuzhou 350002, China

<sup>4</sup> Guangdong Provincial Key Laboratory of Marine Biology, College of Science, Shantou University, Shantou 515063, China

<sup>5</sup> Institute of Geography, Fujian Normal University, Fuzhou, 350007, China

<sup>6</sup> University of Chinese Academy of Sciences, Beijing, 100049, China

<sup>7</sup> Institute of Horticultural Sciences, Jiangxi Academy of Agricultural Sciences, Nanchang 330200, China

<sup>†</sup> These authors have contributed equally to this work and share first authorship.

<sup>\*</sup> **Correspondence:** wy.he@fafu.edu.cn (W.H.); saqib@stu.edu.cn (H.S.A.S)

**Table S1** Mean and range (min-max)—of different vegetation types surrounding the focal crop field (%) within 100, 200, 300, 400 and 500 m radiuses of each sampling site.

| Site name   | Radius | Land uses          |                    |                 |                    |                    |                    |                    |                    |
|-------------|--------|--------------------|--------------------|-----------------|--------------------|--------------------|--------------------|--------------------|--------------------|
|             |        | Brassica           | Built-up           | Fallow          | Cultivated         | Forest             | Grassland          | Non-brassica       | Water              |
| Dahuxiang-1 | 100m   | 31.95(4.03-36.61)  | 5.67(2.53-24.51)   | 0.01(0-0.1)     | 14.72(5.75-16.21)  | 34.48(29.77-62.75) | 12.84(0.62-14.88)  | 0(0-0)             | 0.32(0-2.25)       |
| Dahuxiang-1 | 200m   | 11.21(4.69-12.3)   | 6.34(4.77-15.74)   | 0.01(0-0.06)    | 23.29(14.42-24.77) | 53.4(52.56-58.44)  | 5.38(4.04-5.6)     | 0(0-0)             | 0.37(0-2.61)       |
| Dahuxiang-1 | 300m   | 5.76(2.93-6.23)    | 6.74(4.72-18.83)   | 0.1(0-0.73)     | 24.14(16.22-25.46) | 56.56(48.97-57.83) | 4.14(2.99-11.03)   | 0(0-0)             | 2.55(1.29-2.76)    |
| Dahuxiang-1 | 400m   | 3.85(2.54-4.06)    | 6.67(5.11-16.04)   | 0.14(0-0.97)    | 24.27(22.19-24.62) | 58.78(44.39-61.18) | 3.64(2.23-12.07)   | 0.02(0-0.14)       | 2.63(1.65-2.8)     |
| Dahuxiang-1 | 500m   | 3.18(2.49-3.3)     | 6.76(5.49-14.38)   | 0.35(0.27-0.85) | 22.82(21.9-28.29)  | 61.18(39.41-64.81) | 3.67(2.14-12.84)   | 0.04(0-0.25)       | 2.01(1.48-2.09)    |
| Dahuxiang-2 | 100m   | 4.03(4.03-4.03)    | 24.51(24.51-24.51) | 0.1(0.1-0.1)    | 5.75(5.75-5.75)    | 62.75(62.75-62.75) | 0.62(0.62-0.62)    | 0(0-0)             | 2.25(2.25-2.25)    |
| Dahuxiang-2 | 200m   | 4.69(4.69-4.69)    | 15.74(15.74-15.74) | 0.06(0.06-0.06) | 14.42(14.42-14.42) | 58.44(58.44-58.44) | 4.04(4.04-4.04)    | 0(0-0)             | 2.61(2.61-2.61)    |
| Dahuxiang-2 | 300m   | 2.93(2.93-2.93)    | 18.83(18.83-18.83) | 0.73(0.73-0.73) | 16.22(16.22-16.22) | 48.97(48.97-48.97) | 11.03(11.03-11.03) | 0(0-0)             | 1.29(1.29-1.29)    |
| Dahuxiang-2 | 400m   | 2.54(2.54-2.54)    | 16.04(16.04-16.04) | 0.97(0.97-0.97) | 22.19(22.19-22.19) | 44.39(44.39-44.39) | 12.07(12.07-12.07) | 0.14(0.14-0.14)    | 1.65(1.65-1.65)    |
| Dahuxiang-2 | 500m   | 2.49(2.49-2.49)    | 14.38(14.38-14.38) | 0.85(0.85-0.85) | 28.29(28.29-28.29) | 39.41(39.41-39.41) | 12.84(12.84-12.84) | 0.25(0.25-0.25)    | 1.48(1.48-1.48)    |
| Dahuxiang-3 | 100m   | 15.96(15.96-15.96) | 33.65(33.65-33.65) | 0(0-0)          | 46.69(46.69-46.69) | 0.82(0.82-0.82)    | 1.82(1.82-1.82)    | 0(0-0)             | 1.06(1.06-1.06)    |
| Dahuxiang-3 | 200m   | 2.25(2.25-2.25)    | 4.14(4.14-4.14)    | 0(0-0)          | 15.85(15.85-15.85) | 75.51(75.51-75.51) | 1.47(1.47-1.47)    | 0(0-0)             | 0.78(0.78-0.78)    |
| Dahuxiang-3 | 300m   | 3.31(3.31-3.31)    | 3.41(3.41-3.41)    | 0(0-0)          | 22(22-22)          | 65.77(65.77-65.77) | 4.86(4.86-4.86)    | 0(0-0)             | 0.65(0.65-0.65)    |
| Dahuxiang-3 | 400m   | 3(3-3)             | 3.82(3.82-3.82)    | 0(0-0)          | 26.7(26.7-26.7)    | 59.85(59.85-59.85) | 6.08(6.08-6.08)    | 0(0-0)             | 0.56(0.56-0.56)    |
| Dahuxiang-3 | 500m   | 3.45(3.45-3.45)    | 3.75(3.75-3.75)    | 0(0-0)          | 28.54(28.54-28.54) | 56.01(56.01-56.01) | 7.34(7.34-7.34)    | 0.08(0.08-0.08)    | 0.82(0.82-0.82)    |
| Guangzhuang | 100m   | 14.79(14.79-14.79) | 8.38(8.38-8.38)    | 0(0-0)          | 2.93(2.93-2.93)    | 51.74(51.74-51.74) | 4.78(4.78-4.78)    | 4.57(4.57-4.57)    | 12.8(12.8-12.8)    |
| Guangzhuang | 200m   | 22.03(22.03-22.03) | 18.03(18.03-18.03) | 0(0-0)          | 5.38(5.38-5.38)    | 33.4(33.4-33.4)    | 3.74(3.74-3.74)    | 9.16(9.16-9.16)    | 8.26(8.26-8.26)    |
| Guangzhuang | 300m   | 23.17(23.17-23.17) | 25.79(25.79-25.79) | 0(0-0)          | 5.08(5.08-5.08)    | 23.91(23.91-23.91) | 4.25(4.25-4.25)    | 12.33(12.33-12.33) | 5.46(5.46-5.46)    |
| Guangzhuang | 400m   | 19.56(19.56-19.56) | 28.1(28.1-28.1)    | 2.64(2.64-2.64) | 3.96(3.96-3.96)    | 26.45(26.45-26.45) | 5.88(5.88-5.88)    | 9.5(9.5-9.5)       | 3.91(3.91-3.91)    |
| Guangzhuang | 500m   | 20.85(20.85-20.85) | 26.67(26.67-26.67) | 2.7(2.7-2.7)    | 3.45(3.45-3.45)    | 24.8(24.8-24.8)    | 9.23(9.23-9.23)    | 8.7(8.7-8.7)       | 3.59(3.59-3.59)    |
| Nantong-1   | 100m   | 6.17(6.17-6.17)    | 48.9(48.9-48.9)    | 0(0-0)          | 4.92(4.92-4.92)    | 15.6(15.6-15.6)    | 0(0-0)             | 11.87(11.87-11.87) | 12.54(12.54-12.54) |
| Nantong-1   | 200m   | 3.85(3.85-3.85)    | 40.3(40.3-40.3)    | 0(0-0)          | 6.47(6.47-6.47)    | 23.36(23.36-23.36) | 0.64(0.64-0.64)    | 12.71(12.71-12.71) | 12.68(12.68-12.68) |
| Nantong-1   | 300m   | 3.47(3.47-3.47)    | 41.11(41.11-41.11) | 1.4(1.4-1.4)    | 5.72(5.72-5.72)    | 19.91(19.91-19.91) | 1.18(1.18-1.18)    | 13.82(13.82-13.82) | 13.39(13.39-13.39) |
| Nantong-1   | 400m   | 3.05(3.05-3.05)    | 38.25(38.25-38.25) | 1.43(1.43-1.43) | 6.29(6.29-6.29)    | 17.19(17.19-17.19) | 5.52(5.52-5.52)    | 16.81(16.81-16.81) | 11.47(11.47-11.47) |
| Nantong-1   | 500m   | 3.02(3.02-3.02)    | 35.61(35.61-35.61) | 1.55(1.55-1.55) | 7.81(7.81-7.81)    | 16.43(16.43-16.43) | 5.92(5.92-5.92)    | 18.48(18.48-18.48) | 11.18(11.18-11.18) |
| Nantong-2   | 100m   | 17.43(17.43-17.43) | 76.58(76.58-76.58) | 0(0-0)          | 1.61(1.61-1.61)    | 0(0-0)             | 3.11(3.11-3.11)    | 1.27(1.27-1.27)    | 0(0-0)             |
| Nantong-2   | 200m   | 28.11(28.11-28.11) | 44.14(44.14-44.14) | 0(0-0)          | 1.67(1.67-1.67)    | 6.36(6.36-6.36)    | 1.81(1.81-1.81)    | 3.5(3.5-3.5)       | 14.41(14.41-14.41) |
| Nantong-2   | 300m   | 28.29(28.29-28.29) | 40.96(40.96-40.96) | 0(0-0)          | 2.1(2.1-2.1)       | 4.88(4.88-4.88)    | 1.13(1.13-1.13)    | 8.29(8.29-8.29)    | 14.35(14.35-14.35) |
| Nantong-2   | 400m   | 32.19(32.19-32.19) | 33.42(33.42-33.42) | 0(0-0)          | 3.02(3.02-3.02)    | 6.62(6.62-6.62)    | 1.25(1.25-1.25)    | 12.07(12.07-12.07) | 11.42(11.42-11.42) |
| Nantong-2   | 500m   | 36.65(36.65-36.65) | 28.8(28.8-28.8)    | 0(0-0)          | 4.15(4.15-4.15)    | 6.23(6.23-6.23)    | 1.34(1.34-1.34)    | 12.77(12.77-12.77) | 10.06(10.06-10.06) |

|            |      |                    |                    |                    |                    |                    |                    |                 |                    |
|------------|------|--------------------|--------------------|--------------------|--------------------|--------------------|--------------------|-----------------|--------------------|
| Nantong-3  | 100m | 1.96(1.96-1.96)    | 5.96(5.96-5.96)    | 0(0-0)             | 0(0-0)             | 87.57(87.57-87.57) | 1.18(1.18-1.18)    | 3.02(3.02-3.02) | 0.31(0.31-0.31)    |
| Nantong-3  | 200m | 3(3-3)             | 6(6-6)             | 0(0-0)             | 0(0-0)             | 83.1(83.1-83.1)    | 2.93(2.93-2.93)    | 4.48(4.48-4.48) | 0.49(0.49-0.49)    |
| Nantong-3  | 300m | 5.18(5.18-5.18)    | 5.67(5.67-5.67)    | 0(0-0)             | 0.58(0.58-0.58)    | 78.65(78.65-78.65) | 3.86(3.86-3.86)    | 4.84(4.84-4.84) | 1.23(1.23-1.23)    |
| Nantong-3  | 400m | 5.48(5.48-5.48)    | 5.94(5.94-5.94)    | 0(0-0)             | 0.51(0.51-0.51)    | 79.4(79.4-79.4)    | 3.4(3.4-3.4)       | 4.21(4.21-4.21) | 1.07(1.07-1.07)    |
| Nantong-3  | 500m | 6.57(6.57-6.57)    | 5.88(5.88-5.88)    | 0(0-0)             | 0.5(0.5-0.5)       | 78.28(78.28-78.28) | 3.58(3.58-3.58)    | 4.14(4.14-4.14) | 1.05(1.05-1.05)    |
| Nantong-4  | 100m | 19.07(19.07-19.07) | 66(66-66)          | 0(0-0)             | 1.48(1.48-1.48)    | 0(0-0)             | 2.69(2.69-2.69)    | 0(0-0)          | 10.75(10.75-10.75) |
| Nantong-4  | 200m | 31.23(31.23-31.23) | 46.26(46.26-46.26) | 0(0-0)             | 1.36(1.36-1.36)    | 0(0-0)             | 7.4(7.4-7.4)       | 5.88(5.88-5.88) | 7.88(7.88-7.88)    |
| Nantong-4  | 300m | 27.2(27.2-27.2)    | 28.87(28.87-28.87) | 0(0-0)             | 1.35(1.35-1.35)    | 16.37(16.37-16.37) | 8.81(8.81-8.81)    | 7.61(7.61-7.61) | 9.79(9.79-9.79)    |
| Nantong-4  | 400m | 32.76(32.76-32.76) | 22.34(22.34-22.34) | 0(0-0)             | 1.46(1.46-1.46)    | 12.66(12.66-12.66) | 13.92(13.92-13.92) | 7.73(7.73-7.73) | 9.12(9.12-9.12)    |
| Nantong-4  | 500m | 31.36(31.36-31.36) | 20.66(20.66-20.66) | 0(0-0)             | 4.41(4.41-4.41)    | 11.31(11.31-11.31) | 14.62(14.62-14.62) | 7.27(7.27-7.27) | 10.37(10.37-10.37) |
| Nantong-5  | 100m | 16.88(16.88-16.88) | 20.75(20.75-20.75) | 0(0-0)             | 0(0-0)             | 43.96(43.96-43.96) | 3.2(3.2-3.2)       | 0(0-0)          | 15.22(15.22-15.22) |
| Nantong-5  | 200m | 19.34(19.34-19.34) | 25.56(25.56-25.56) | 0(0-0)             | 0(0-0)             | 28.15(28.15-28.15) | 3.06(3.06-3.06)    | 2.63(2.63-2.63) | 21.27(21.27-21.27) |
| Nantong-5  | 300m | 19.61(19.61-19.61) | 16.64(16.64-16.64) | 0(0-0)             | 0(0-0)             | 25.6(25.6-25.6)    | 7.58(7.58-7.58)    | 4.85(4.85-4.85) | 25.73(25.73-25.73) |
| Nantong-5  | 400m | 22.16(22.16-22.16) | 13.5(13.5-13.5)    | 0(0-0)             | 0(0-0)             | 27.03(27.03-27.03) | 9.39(9.39-9.39)    | 3.57(3.57-3.57) | 24.35(24.35-24.35) |
| Nantong-5  | 500m | 23.91(23.91-23.91) | 12.52(12.52-12.52) | 0(0-0)             | 0(0-0)             | 27.15(27.15-27.15) | 9.8(9.8-9.8)       | 3.37(3.37-3.37) | 23.26(23.26-23.26) |
| Xiaomifeng | 100m | 1.6(1.6-1.6)       | 4.17(4.17-4.17)    | 0(0-0)             | 0(0-0)             | 88.13(88.13-88.13) | 5.2(5.2-5.2)       | 0.7(0.7-0.7)    | 0.2(0.2-0.2)       |
| Xiaomifeng | 200m | 1.91(1.91-1.91)    | 2.21(2.21-2.21)    | 23.02(23.02-23.02) | 0(0-0)             | 64.55(64.55-64.55) | 5.09(5.09-5.09)    | 2.91(2.91-2.91) | 0.31(0.31-0.31)    |
| Xiaomifeng | 300m | 1.71(1.71-1.71)    | 2.72(2.72-2.72)    | 20.62(20.62-20.62) | 0(0-0)             | 63.62(63.62-63.62) | 5.87(5.87-5.87)    | 5.19(5.19-5.19) | 0.27(0.27-0.27)    |
| Xiaomifeng | 400m | 1.56(1.56-1.56)    | 2.89(2.89-2.89)    | 18.84(18.84-18.84) | 0(0-0)             | 64.39(64.39-64.39) | 5.52(5.52-5.52)    | 6.38(6.38-6.38) | 0.42(0.42-0.42)    |
| Xiaomifeng | 500m | 1.51(1.51-1.51)    | 3.04(3.04-3.04)    | 18.22(18.22-18.22) | 0(0-0)             | 63.6(63.6-63.6)    | 6.4(6.4-6.4)       | 6.83(6.83-6.83) | 0.4(0.4-0.4)       |
| Xinan      | 100m | 40.03(40.03-40.03) | 31.31(31.31-31.31) | 0(0-0)             | 26.46(26.46-26.46) | 0(0-0)             | 0.08(0.08-0.08)    | 2.11(2.11-2.11) | 0(0-0)             |
| Xinan      | 200m | 16.24(16.24-16.24) | 31.43(31.43-31.43) | 2.72(2.72-2.72)    | 16.1(16.1-16.1)    | 31.25(31.25-31.25) | 1.53(1.53-1.53)    | 0.39(0.39-0.39) | 0.35(0.35-0.35)    |
| Xinan      | 300m | 10.4(10.4-10.4)    | 25.87(25.87-25.87) | 4.06(4.06-4.06)    | 12.45(12.45-12.45) | 32.17(32.17-32.17) | 3.92(3.92-3.92)    | 0.5(0.5-0.5)    | 10.63(10.63-10.63) |
| Xinan      | 400m | 8.58(8.58-8.58)    | 22.87(22.87-22.87) | 4.15(4.15-4.15)    | 12.25(12.25-12.25) | 34.41(34.41-34.41) | 5.88(5.88-5.88)    | 0.35(0.35-0.35) | 11.51(11.51-11.51) |
| Xinan      | 500m | 8.19(8.19-8.19)    | 22.41(22.41-22.41) | 5.69(5.69-5.69)    | 12.33(12.33-12.33) | 34.08(34.08-34.08) | 6.56(6.56-6.56)    | 0.32(0.32-0.32) | 10.42(10.42-10.42) |
| Xiqian     | 100m | 9.64(9.64-9.64)    | 50.53(50.53-50.53) | 0(0-0)             | 25.89(25.89-25.89) | 0(0-0)             | 13.48(13.48-13.48) | 0(0-0)          | 0.46(0.46-0.46)    |
| Xiqian     | 200m | 8.97(8.97-8.97)    | 20.57(20.57-20.57) | 0(0-0)             | 19.86(19.86-19.86) | 0.07(0.07-0.07)    | 33.41(33.41-33.41) | 0(0-0)          | 17.13(17.13-17.13) |
| Xiqian     | 300m | 6.64(6.64-6.64)    | 17.59(17.59-17.59) | 0(0-0)             | 18.65(18.65-18.65) | 24.67(24.67-24.67) | 23.26(23.26-23.26) | 0.08(0.08-0.08) | 9.11(9.11-9.11)    |
| Xiqian     | 400m | 8.51(8.51-8.51)    | 16.53(16.53-16.53) | 0(0-0)             | 17.54(17.54-17.54) | 29.85(29.85-29.85) | 19.06(19.06-19.06) | 0.21(0.21-0.21) | 8.31(8.31-8.31)    |
| Xiqian     | 500m | 9.28(9.28-9.28)    | 18.24(18.24-18.24) | 0(0-0)             | 17.71(17.71-17.71) | 28.8(28.8-28.8)    | 18.04(18.04-18.04) | 0.88(0.88-0.88) | 7.06(7.06-7.06)    |

Non-cruciferous vegetables include eggplant, pepper, tomatoes, bean, and corn.

Forest include coniferous, bamboo and broad-leaved trees.

Grassland include the strip and patch grassland in cultivated area and natural grass between forest and cultivated land.

Urban include residential district, road and artificial greenhouse.

Water include river, pond and reservoir.

**Table S2** Soil physiochemical properties in each sampling site.

| Region      | Calcium (Ca) | Copper (Cu) | Iron (Fe)      | Potassium (K)  | Magnesium (Mg) | Manganese (Mn) | Nitrogen (N) | Phosphorus (P)       | Zinc (Zn)  |
|-------------|--------------|-------------|----------------|----------------|----------------|----------------|--------------|----------------------|------------|
| Dahuxiang-1 | 605.19±73.57 | 8.46±0.54   | 4645±538       | 4974.77±250.37 | 291.94±14.17   | 112.86±4.88    | 0.4±0.01     | 11331.97±102.92      | 32.71±2.35 |
| Dahuxiang-2 | 701.16±45.56 | 10.95±0.41  | 2234±85.94     | 5561.48±20.23  | 338.88±7.16    | 143.5±3.88     | 0.36±0.01    | 11275.6±140.28       | 37.7±0.66  |
| Dahuxiang-3 | 176.6±5.25   | 4.17±0.24   | 824.17±58.85   | 4334.11±54.94  | 113.5±2.44     | 90.21±3.89     | 0.33±0.02    | 7647.59±107.79       | 19.63±0.62 |
| Guangzhuang | 221.65±5.59  | 3.67±0.23   | 2037.5±121.95  | 6458.41±83.07  | 172.8±3.77     | 122.92±7.63    | 0.43±0.01    | 6432.73±68           | 34.71±2.13 |
| Nantong-1   | 273.2±7.2    | 5.08±0.32   | 5569.17±279.05 | 7335.11±41.53  | 321.9±3.85     | 282.29±26.28   | 0.44±0.01    | 9791.16±94.84        | 43.75±0.83 |
| Nantong-2   | 224.15±15.08 | 14.21±1.22  | 5299.17±356.87 | 6846.18±125.43 | 311.75±7.48    | 347.29±31.48   | 21.93±8.98   | 7085.34±447.48       | 43.71±1.73 |
| Nantong-3   | 200.15±7.45  | 3.42±0.33   | 1473.33±127.38 | 5784.03±28.69  | 172.6±5.9      | 156.25±9.12    | 0.37±0.01    | 8719.38±463.61       | 28.5±1.05  |
| Nantong-4   | 319.7±6.92   | 7.17±0.81   | 5486.67±174.65 | 7469.98±59.07  | 410.7±1.71     | 505.63±20      | 0.42±0.01    | 2652.61±51.15        | 41.25±1.62 |
| Nantong-5   | 251.7±19.28  | 15.08±1.24  | 7349.17±725.35 | 7082.21±126.2  | 343.45±2.55    | 285±10.81      | 0.31±0.03    | 7853.41±514.55       | 57.42±0.71 |
| Xiaomifeng  | 520.9±23.7   | 38.96±0.71  | 5451.67±259.57 | 4114.93±51.73  | 286.4±5.35     | 543.75±39.81   | 0.34±0.02    | 1198859.94±495736.52 | 67.46±1.22 |
| Xinan       | 394.15±18.04 | 4.54±0.14   | 2355.83±186.07 | 4249.81±29.54  | 145.4±1.91     | 142.71±13.08   | 0.37±0.02    | 8217.37±395.43       | 18.58±0.41 |
| Xiqian      | 520.95±6.15  | 20.29±0.41  | 7610±609.48    | 3423.69±20.77  | 321.15±6.25    | 266.67±14.09   | 0.42±0.01    | 3247.49±96.87        | 59.08±1.63 |

**Table S3** Linear response results of alpha diversity indices against different host plant and soil types and their interaction.

| Kingdom  | Factors         | Chao1   |         | ACE     |         | Shannon |         |
|----------|-----------------|---------|---------|---------|---------|---------|---------|
|          |                 | F-value | P-value | F-value | P-value | F-value | P-value |
| Bacteria | Host plant (HP) | 6.340   | 0.013   | 8.813   | 0.003   | 5.834   | 0.017   |
|          | Soil type (ST)  | 7.911   | 0.006   | 13.724  | 0.000   | 0.084   | 0.772   |
|          | HP*ST           | 29.567  | 0.000   | 18.650  | 0.000   | 21.741  | 0.000   |
| Fungi    | Host plant (HP) | 1.255   | 0.264   | 3.009   | 0.085   | 12.444  | 0.001   |
|          | Soil type (ST)  | 33.805  | 0.000   | 32.342  | 0.000   | 16.428  | 0.000   |
|          | HP*ST           | 8.947   | 0.003   | 12.515  | 0.001   | 2.559   | 0.112   |

**Table S4** ANOVA results of each axis in RDA model explaining the variance in assemblages of bacteria and fungi.

| RDA axis | Bacteria |         | Fungi   |         |
|----------|----------|---------|---------|---------|
|          | F-value  | P-value | F-value | P-value |
| RDA1     | 142.717  | 0.001   | 364.828 | 0.001   |
| RDA2     | 107.015  | 0.001   | 116.32  | 0.001   |
| RDA3     | 41.6626  | 0.001   | 44.709  | 0.001   |
| RDA4     | 18.6081  | 0.001   | 17.1641 | 0.001   |
| RDA5     | 14.1936  | 0.001   | 12.4698 | 0.001   |
| RDA6     | 8.9764   | 0.003   | 5.7999  | 0.057   |
| RDA7     | 7.0576   | 0.012   | 5.3179  | 0.075   |
| RDA8     | 3.5728   | 0.44    | 2.2123  | 0.928   |
| RDA9     | 1.604    | 0.986   | 1.5693  | 0.993   |
| RDA10    | 1.0745   | 0.999   | 0.8894  | 0.999   |
| RDA11    | 0.5652   | 1       | 0.7303  | 1       |
| RDA12    | 0.3339   | 1       | 0.2118  | 1       |
| RDA13    | 0.2088   | 1       | 0.0548  | 1       |
| RDA14    | 0.094    | 1       | 0.0145  | 1       |
| RDA15    | 0.0267   | 1       | 0.0002  | 1       |

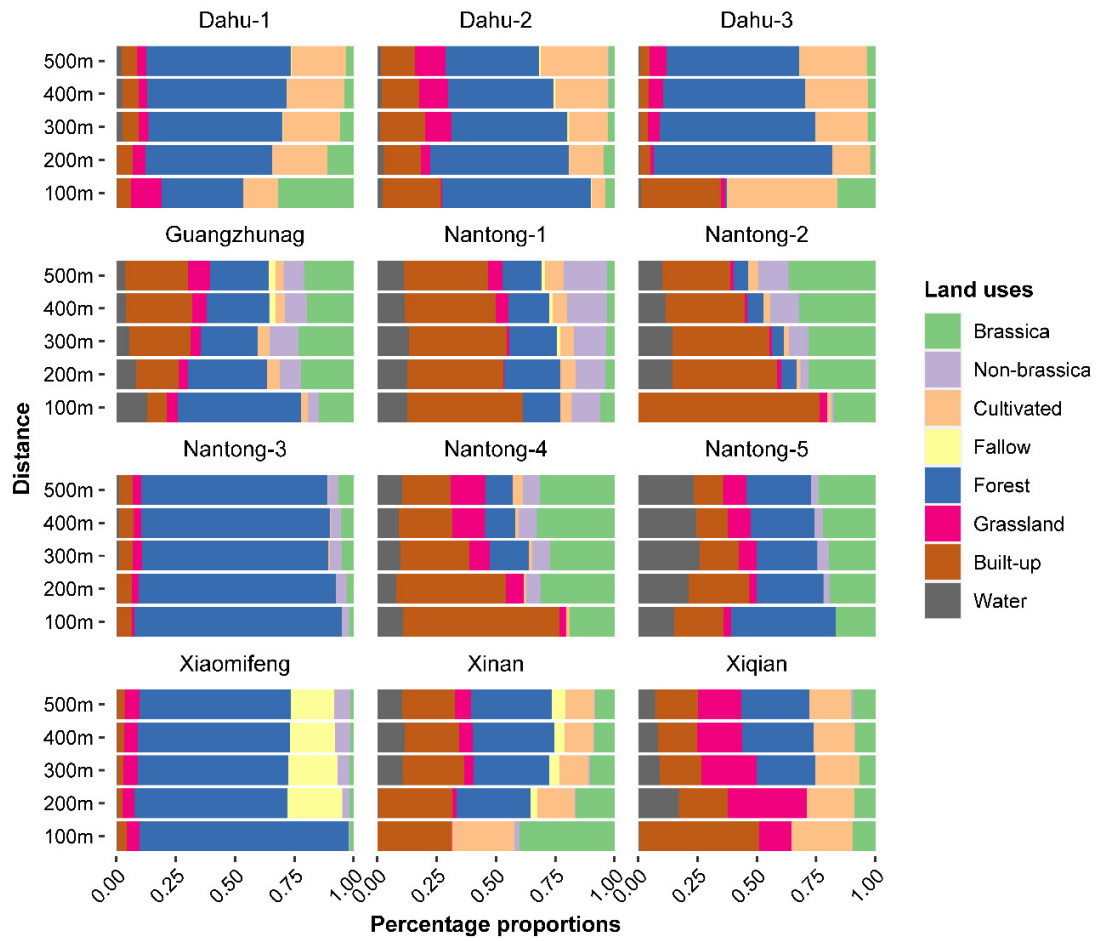

**Figure S1** Barplot shows different percentage proportion of different land uses at different sampling sites. The land uses include cultivated land, built-up, water, forest, grassland, fallow, brassica and non-brassica. The radiuses within 100, 200, 300, 400 and 500 around the focal patch of different sampling sites were studied.

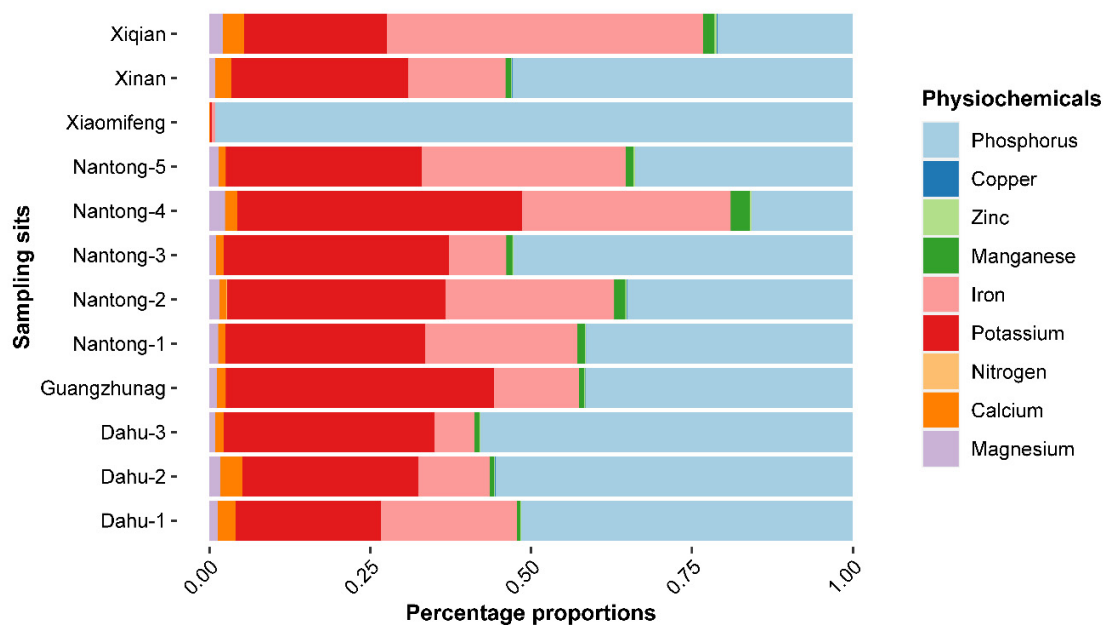

**Figure S2** Barplot shows the relative occurrences of soil physiochemical elements in different fields. Elements consist of calcium, iron, potassium, manganese, nitrogen,

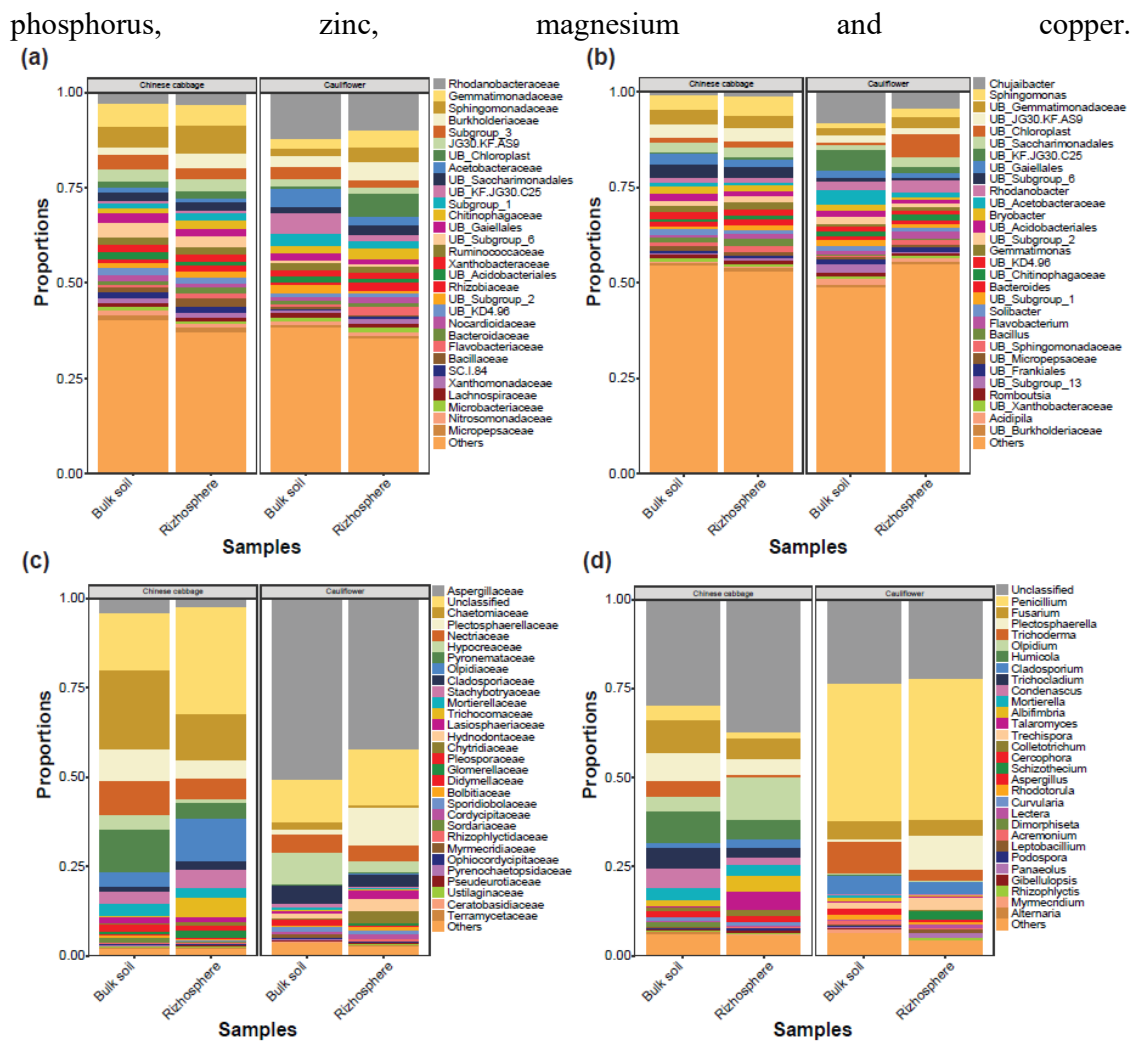

**Figure S3.** Relative abundance (%) of different soil bacterial and fungal communities in bulk and rhizospheric soils collected from Chinese cabbage and flower cabbage fields. (a) Relative abundance of bacteria at family level; (b) Relative abundance of fungi at family level; (c) Relative abundance of bacteria at genus level; (d) Relative abundance of fungi at genus level.
